# Supplementary material for: Prevalence and patterns of higher-order drug interactions in Escherichia coli
Source: PubMed Central journal article supplement (PMC6119685; doi:10.1038/s41540-018-0069-9), 2018-09-03
Supplement: 41540_2018_69_MOESM2_ESM.pdf [file 41540_2018_69_MOESM2_ESM.pdf]

Table with multiple columns containing numerical data, likely representing a dataset or a grid of values. The table is structured with rows and columns, and contains various numerical entries.









Table with 10 columns containing numerical data. The table is organized in a repeating grid pattern across the page.



Table with columns: AMP, CRP, RUS, USG, and multiple columns of numerical data. The table contains 100 rows of data, each representing a different location or facility. The columns represent various metrics, likely related to air quality or environmental monitoring. The data is organized in a grid format, with the first four columns (AMP, CRP, RUS, USG) providing categorical information and the subsequent columns providing numerical values. The values are often presented in a 2x2 grid for each row, suggesting a comparison of two different metrics or conditions. The overall structure is a dense, repetitive table of data points.









Table with multiple columns containing alphanumeric identifiers (e.g., AMP, OPR, STR, DCM, TDP, AMP-CR, AMP-FCR, AMP-FCR-TMP, AMP-FCR-TMP-T) and numerical data points.











































































|                |                |                |                |                |                |                |                |                |                |                |                |                |                |                |                |                |                |                |                |                |                |                |                |                |                |                |                |                |                |                |                |                |                |                |                |                |                |                |                |                |                |                |                |                |                |                |                |                |                |                |                |                |                |                |                |                |                |                |                |                |                |                |                |                |                |                |                |                |                |                |                |                |                |                |                |                |                |                |                |                |                |                |                |                |                |                |                |                |                |                |                |                |                |                |                |                |                |                |                |
|----------------|----------------|----------------|----------------|----------------|----------------|----------------|----------------|----------------|----------------|----------------|----------------|----------------|----------------|----------------|----------------|----------------|----------------|----------------|----------------|----------------|----------------|----------------|----------------|----------------|----------------|----------------|----------------|----------------|----------------|----------------|----------------|----------------|----------------|----------------|----------------|----------------|----------------|----------------|----------------|----------------|----------------|----------------|----------------|----------------|----------------|----------------|----------------|----------------|----------------|----------------|----------------|----------------|----------------|----------------|----------------|----------------|----------------|----------------|----------------|----------------|----------------|----------------|----------------|----------------|----------------|----------------|----------------|----------------|----------------|----------------|----------------|----------------|----------------|----------------|----------------|----------------|----------------|----------------|----------------|----------------|----------------|----------------|----------------|----------------|----------------|----------------|----------------|----------------|----------------|----------------|----------------|----------------|----------------|----------------|----------------|----------------|----------------|----------------|----------------|
| AMPERISTEST001 | AMPERISTEST002 | AMPERISTEST003 | AMPERISTEST004 | AMPERISTEST005 | AMPERISTEST006 | AMPERISTEST007 | AMPERISTEST008 | AMPERISTEST009 | AMPERISTEST010 | AMPERISTEST011 | AMPERISTEST012 | AMPERISTEST013 | AMPERISTEST014 | AMPERISTEST015 | AMPERISTEST016 | AMPERISTEST017 | AMPERISTEST018 | AMPERISTEST019 | AMPERISTEST020 | AMPERISTEST021 | AMPERISTEST022 | AMPERISTEST023 | AMPERISTEST024 | AMPERISTEST025 | AMPERISTEST026 | AMPERISTEST027 | AMPERISTEST028 | AMPERISTEST029 | AMPERISTEST030 | AMPERISTEST031 | AMPERISTEST032 | AMPERISTEST033 | AMPERISTEST034 | AMPERISTEST035 | AMPERISTEST036 | AMPERISTEST037 | AMPERISTEST038 | AMPERISTEST039 | AMPERISTEST040 | AMPERISTEST041 | AMPERISTEST042 | AMPERISTEST043 | AMPERISTEST044 | AMPERISTEST045 | AMPERISTEST046 | AMPERISTEST047 | AMPERISTEST048 | AMPERISTEST049 | AMPERISTEST050 | AMPERISTEST051 | AMPERISTEST052 | AMPERISTEST053 | AMPERISTEST054 | AMPERISTEST055 | AMPERISTEST056 | AMPERISTEST057 | AMPERISTEST058 | AMPERISTEST059 | AMPERISTEST060 | AMPERISTEST061 | AMPERISTEST062 | AMPERISTEST063 | AMPERISTEST064 | AMPERISTEST065 | AMPERISTEST066 | AMPERISTEST067 | AMPERISTEST068 | AMPERISTEST069 | AMPERISTEST070 | AMPERISTEST071 | AMPERISTEST072 | AMPERISTEST073 | AMPERISTEST074 | AMPERISTEST075 | AMPERISTEST076 | AMPERISTEST077 | AMPERISTEST078 | AMPERISTEST079 | AMPERISTEST080 | AMPERISTEST081 | AMPERISTEST082 | AMPERISTEST083 | AMPERISTEST084 | AMPERISTEST085 | AMPERISTEST086 | AMPERISTEST087 | AMPERISTEST088 | AMPERISTEST089 | AMPERISTEST090 | AMPERISTEST091 | AMPERISTEST092 | AMPERISTEST093 | AMPERISTEST094 | AMPERISTEST095 | AMPERISTEST096 | AMPERISTEST097 | AMPERISTEST098 | AMPERISTEST099 | AMPERISTEST100 |
|----------------|----------------|----------------|----------------|----------------|----------------|----------------|----------------|----------------|----------------|----------------|----------------|----------------|----------------|----------------|----------------|----------------|----------------|----------------|----------------|----------------|----------------|----------------|----------------|----------------|----------------|----------------|----------------|----------------|----------------|----------------|----------------|----------------|----------------|----------------|----------------|----------------|----------------|----------------|----------------|----------------|----------------|----------------|----------------|----------------|----------------|----------------|----------------|----------------|----------------|----------------|----------------|----------------|----------------|----------------|----------------|----------------|----------------|----------------|----------------|----------------|----------------|----------------|----------------|----------------|----------------|----------------|----------------|----------------|----------------|----------------|----------------|----------------|----------------|----------------|----------------|----------------|----------------|----------------|----------------|----------------|----------------|----------------|----------------|----------------|----------------|----------------|----------------|----------------|----------------|----------------|----------------|----------------|----------------|----------------|----------------|----------------|----------------|----------------|----------------|

















Table with multiple columns for coordinates and values. Each row represents a specific location or point, with columns containing numerical data and alphanumeric labels.









| Geographic Area | Year     | Indicator | Value     | Year      | Indicator | Value     | Year      | Indicator | Value     |
|-----------------|----------|-----------|-----------|-----------|-----------|-----------|-----------|-----------|-----------|
| 78.180320       | 8.062007 | 79.197211 | 79.182000 | 78.893280 | 79.246570 | 81.767720 | 80.189356 | 80.252867 | 81.422114 |
| 78.180320       | 8.062007 | 79.197211 | 79.182000 | 78.893280 | 79.246570 | 81.767720 | 80.189356 | 80.252867 | 81.422114 |
| 78.180320       | 8.062007 | 79.197211 | 79.182000 | 78.893280 | 79.246570 | 81.767720 | 80.189356 | 80.252867 | 81.422114 |
| 78.180320       | 8.062007 | 79.197211 | 79.182000 | 78.893280 | 79.246570 | 81.767720 | 80.189356 | 80.252867 | 81.422114 |
| 78.180320       | 8.062007 | 79.197211 | 79.182000 | 78.893280 | 79.246570 | 81.767720 | 80.189356 | 80.252867 | 81.422114 |



















| AMP       | FCM       | RFI       | CFM       | RCM       | ACM       | FCM       | RFI       | CFM       | RCM       | ACM       | FCM       | RFI       | CFM       | RCM       | ACM       | FCM       | RFI       | CFM       | RCM       | ACM       | FCM       | RFI       | CFM       | RCM       | ACM       | FCM       | RFI       | CFM       | RCM       | ACM       | FCM       | RFI       | CFM       | RCM       | ACM       | FCM       | RFI       | CFM       | RCM       |
|-----------|-----------|-----------|-----------|-----------|-----------|-----------|-----------|-----------|-----------|-----------|-----------|-----------|-----------|-----------|-----------|-----------|-----------|-----------|-----------|-----------|-----------|-----------|-----------|-----------|-----------|-----------|-----------|-----------|-----------|-----------|-----------|-----------|-----------|-----------|-----------|-----------|-----------|-----------|-----------|
| 727023107 | 14.584632 | 08.228653 | 10.728048 | 09.866832 | 12.127804 | 09.260832 | 12.560832 | 11.820832 | 11.020832 | 10.520832 | 10.020832 | 11.520832 | 11.020832 | 10.520832 | 10.020832 | 11.520832 | 11.020832 | 10.520832 | 10.020832 | 11.520832 | 11.020832 | 10.520832 | 10.020832 | 11.520832 | 11.020832 | 10.520832 | 10.020832 | 11.520832 | 11.020832 | 10.520832 | 10.020832 | 11.520832 | 11.020832 | 10.520832 | 10.020832 | 11.520832 | 11.020832 | 10.520832 | 10.020832 |

























|            |           |          |           |           |           |           |          |           |           |           |          |           |           |           |          |          |           |           |           |           |           |           |           |           |           |           |           |           |           |           |
|------------|-----------|----------|-----------|-----------|-----------|-----------|----------|-----------|-----------|-----------|----------|-----------|-----------|-----------|----------|----------|-----------|-----------|-----------|-----------|-----------|-----------|-----------|-----------|-----------|-----------|-----------|-----------|-----------|-----------|
| 8074804837 | 977074223 | 86451152 | 977057134 | 920130885 | 717055095 | 981070511 | 94121157 | 100262414 | 881798513 | 101494568 | 80481213 | 952011516 | 953898867 | 897251288 | 18265905 | 89784155 | 712773807 | 102514774 | 100080883 | 897387467 | 792326071 | 957497224 | 867415264 | 101426641 | 819619632 | 868017265 | 953687875 | 100471268 | 852888665 | 962387255 |
| 8074804837 | 977074223 | 86451152 | 977057134 | 920130885 | 717055095 | 981070511 | 94121157 | 100262414 | 881798513 | 101494568 | 80481213 | 952011516 | 953898867 | 897251288 | 18265905 | 89784155 | 712773807 | 102514774 | 100080883 | 897387467 | 792326071 | 957497224 | 867415264 | 101426641 | 819619632 | 868017265 | 953687875 | 100471268 | 852888665 | 962387255 |
| 8074804837 | 977074223 | 86451152 | 977057134 | 920130885 | 717055095 | 981070511 | 94121157 | 100262414 | 881798513 | 101494568 | 80481213 | 952011516 | 953898867 | 897251288 | 18265905 | 89784155 | 712773807 | 102514774 | 100080883 | 897387467 | 792326071 | 957497224 | 867415264 | 101426641 | 819619632 | 868017265 | 953687875 | 100471268 | 852888665 | 962387255 |
| 8074804837 | 977074223 | 86451152 | 977057134 | 920130885 | 717055095 | 981070511 | 94121157 | 100262414 | 881798513 | 101494568 | 80481213 | 952011516 | 953898867 | 897251288 | 18265905 | 89784155 | 712773807 | 102514774 | 100080883 | 897387467 | 792326071 | 957497224 | 867415264 | 101426641 | 819619632 | 868017265 | 953687875 | 100471268 | 852888665 | 962387255 |
| 8074804837 | 977074223 | 86451152 | 977057134 | 920130885 | 717055095 | 981070511 | 94121157 | 100262414 | 881798513 | 101494568 | 80481213 | 952011516 | 953898867 | 897251288 | 18265905 | 89784155 | 712773807 | 102514774 | 100080883 | 897387467 | 792326071 | 957497224 | 867415264 | 101426641 | 819619632 | 868017265 | 953687875 | 100471268 | 852888665 | 962387255 |



|          |          |          |          |          |          |          |          |          |          |          |          |          |          |          |          |          |          |          |          |          |          |          |          |          |          |          |          |          |          |          |          |          |          |          |          |          |          |          |          |          |          |          |          |          |          |          |          |          |          |          |          |          |          |          |          |          |          |          |          |          |          |          |          |          |          |          |          |          |          |          |          |          |          |          |          |          |          |          |          |          |          |          |          |          |          |          |          |          |          |          |          |          |          |          |          |          |          |          |          |          |          |          |          |          |          |          |          |          |          |          |          |          |          |          |          |          |          |          |          |          |          |          |          |          |          |          |          |          |          |          |          |          |          |          |          |          |          |          |          |          |          |          |          |          |          |          |          |          |          |          |          |          |          |          |          |          |          |          |          |          |          |          |          |          |          |          |          |          |          |          |          |          |          |          |          |          |          |          |          |          |          |          |
|----------|----------|----------|----------|----------|----------|----------|----------|----------|----------|----------|----------|----------|----------|----------|----------|----------|----------|----------|----------|----------|----------|----------|----------|----------|----------|----------|----------|----------|----------|----------|----------|----------|----------|----------|----------|----------|----------|----------|----------|----------|----------|----------|----------|----------|----------|----------|----------|----------|----------|----------|----------|----------|----------|----------|----------|----------|----------|----------|----------|----------|----------|----------|----------|----------|----------|----------|----------|----------|----------|----------|----------|----------|----------|----------|----------|----------|----------|----------|----------|----------|----------|----------|----------|----------|----------|----------|----------|----------|----------|----------|----------|----------|----------|----------|----------|----------|----------|----------|----------|----------|----------|----------|----------|----------|----------|----------|----------|----------|----------|----------|----------|----------|----------|----------|----------|----------|----------|----------|----------|----------|----------|----------|----------|----------|----------|----------|----------|----------|----------|----------|----------|----------|----------|----------|----------|----------|----------|----------|----------|----------|----------|----------|----------|----------|----------|----------|----------|----------|----------|----------|----------|----------|----------|----------|----------|----------|----------|----------|----------|----------|----------|----------|----------|----------|----------|----------|----------|----------|----------|----------|----------|----------|----------|----------|----------|----------|----------|----------|----------|----------|----------|----------|
| 90381805 | 90381900 | 90382000 | 90382100 | 90382200 | 90382300 | 90382400 | 90382500 | 90382600 | 90382700 | 90382800 | 90382900 | 90383000 | 90383100 | 90383200 | 90383300 | 90383400 | 90383500 | 90383600 | 90383700 | 90383800 | 90383900 | 90384000 | 90384100 | 90384200 | 90384300 | 90384400 | 90384500 | 90384600 | 90384700 | 90384800 | 90384900 | 90385000 | 90385100 | 90385200 | 90385300 | 90385400 | 90385500 | 90385600 | 90385700 | 90385800 | 90385900 | 90386000 | 90386100 | 90386200 | 90386300 | 90386400 | 90386500 | 90386600 | 90386700 | 90386800 | 90386900 | 90387000 | 90387100 | 90387200 | 90387300 | 90387400 | 90387500 | 90387600 | 90387700 | 90387800 | 90387900 | 90388000 | 90388100 | 90388200 | 90388300 | 90388400 | 90388500 | 90388600 | 90388700 | 90388800 | 90388900 | 90389000 | 90389100 | 90389200 | 90389300 | 90389400 | 90389500 | 90389600 | 90389700 | 90389800 | 90389900 | 90390000 | 90390100 | 90390200 | 90390300 | 90390400 | 90390500 | 90390600 | 90390700 | 90390800 | 90390900 | 90391000 | 90391100 | 90391200 | 90391300 | 90391400 | 90391500 | 90391600 | 90391700 | 90391800 | 90391900 | 90392000 | 90392100 | 90392200 | 90392300 | 90392400 | 90392500 | 90392600 | 90392700 | 90392800 | 90392900 | 90393000 | 90393100 | 90393200 | 90393300 | 90393400 | 90393500 | 90393600 | 90393700 | 90393800 | 90393900 | 90394000 | 90394100 | 90394200 | 90394300 | 90394400 | 90394500 | 90394600 | 90394700 | 90394800 | 90394900 | 90395000 | 90395100 | 90395200 | 90395300 | 90395400 | 90395500 | 90395600 | 90395700 | 90395800 | 90395900 | 90396000 | 90396100 | 90396200 | 90396300 | 90396400 | 90396500 | 90396600 | 90396700 | 90396800 | 90396900 | 90397000 | 90397100 | 90397200 | 90397300 | 90397400 | 90397500 | 90397600 | 90397700 | 90397800 | 90397900 | 90398000 | 90398100 | 90398200 | 90398300 | 90398400 | 90398500 | 90398600 | 90398700 | 90398800 | 90398900 | 90399000 | 90399100 | 90399200 | 90399300 | 90399400 | 90399500 | 90399600 | 90399700 | 90399800 | 90399900 | 90400000 |
|----------|----------|----------|----------|----------|----------|----------|----------|----------|----------|----------|----------|----------|----------|----------|----------|----------|----------|----------|----------|----------|----------|----------|----------|----------|----------|----------|----------|----------|----------|----------|----------|----------|----------|----------|----------|----------|----------|----------|----------|----------|----------|----------|----------|----------|----------|----------|----------|----------|----------|----------|----------|----------|----------|----------|----------|----------|----------|----------|----------|----------|----------|----------|----------|----------|----------|----------|----------|----------|----------|----------|----------|----------|----------|----------|----------|----------|----------|----------|----------|----------|----------|----------|----------|----------|----------|----------|----------|----------|----------|----------|----------|----------|----------|----------|----------|----------|----------|----------|----------|----------|----------|----------|----------|----------|----------|----------|----------|----------|----------|----------|----------|----------|----------|----------|----------|----------|----------|----------|----------|----------|----------|----------|----------|----------|----------|----------|----------|----------|----------|----------|----------|----------|----------|----------|----------|----------|----------|----------|----------|----------|----------|----------|----------|----------|----------|----------|----------|----------|----------|----------|----------|----------|----------|----------|----------|----------|----------|----------|----------|----------|----------|----------|----------|----------|----------|----------|----------|----------|----------|----------|----------|----------|----------|----------|----------|----------|----------|----------|----------|----------|----------|----------|







































Table with columns for various identifiers (e.g., AMF025820, RUS, DOK, UDF, FUG) and rows of numerical data. Each row represents a specific record across multiple categories.























































Table with 4 columns: S/N, Frequency, Bandwidth, and Modulation. Contains a large number of rows representing various channel configurations.













Table with columns for identification numbers (e.g., 42100975, 42100976, etc.), company codes, and names. Each row contains a long list of these identifiers, representing different entities or records.













































































































































|    |         |          |          |          |          |          |          |          |          |          |          |          |          |          |          |          |          |          |          |          |          |          |          |          |          |          |          |          |          |          |          |          |          |          |          |          |          |          |          |          |          |          |          |          |          |          |          |          |          |          |          |          |          |          |          |          |          |          |          |          |          |          |          |          |          |          |          |          |          |          |          |          |          |          |          |          |          |          |          |          |          |          |          |          |          |          |          |          |          |          |          |          |          |          |          |          |          |          |          |          |          |          |          |          |          |          |          |          |          |          |          |          |          |          |          |          |          |          |          |          |          |          |          |          |          |          |          |          |          |          |          |          |          |          |          |          |          |          |          |          |          |          |          |          |          |          |          |          |          |          |          |          |          |          |          |          |          |          |          |          |          |          |          |          |          |          |          |          |          |          |          |          |          |          |          |          |          |          |          |          |          |          |          |          |          |          |          |          |          |          |          |          |          |          |          |          |          |          |          |          |          |          |          |          |          |          |          |          |          |          |          |          |          |          |          |          |          |          |          |          |          |          |          |          |          |          |          |          |          |          |          |          |          |          |          |          |          |          |          |          |          |          |          |          |          |          |          |          |          |          |          |          |          |          |          |          |          |          |          |          |          |          |          |          |          |          |          |          |          |          |          |          |          |          |          |          |          |          |          |          |          |          |          |          |          |          |          |          |          |          |          |          |          |          |          |          |          |          |          |          |          |          |          |          |          |          |          |          |          |          |          |          |          |          |          |          |          |          |          |          |          |          |          |          |          |          |          |          |          |          |          |          |          |          |          |          |          |          |          |          |          |          |          |          |          |          |          |          |          |          |          |          |          |          |          |          |          |          |          |          |          |          |          |          |          |          |          |          |          |          |          |          |          |          |          |          |          |          |          |          |          |          |          |          |          |          |          |          |          |          |          |          |          |          |          |          |          |          |          |          |          |          |          |          |          |          |          |          |          |          |          |          |          |          |          |          |          |          |          |          |          |          |          |          |          |          |          |          |          |          |          |          |          |          |          |          |          |          |          |          |          |          |          |          |          |          |          |          |          |          |          |          |          |          |          |          |          |          |          |          |          |          |          |          |          |          |          |          |          |          |          |          |          |          |          |          |          |          |          |          |          |          |          |          |          |          |          |          |          |          |          |          |          |          |          |          |          |          |          |          |          |          |          |          |          |          |          |          |          |          |          |          |          |          |          |          |          |          |          |          |          |          |          |          |          |          |          |          |          |          |          |          |          |          |          |          |          |          |          |          |          |          |          |          |          |          |          |          |          |          |          |          |          |          |          |          |          |          |          |          |          |          |          |          |          |          |          |          |          |          |          |          |          |          |          |          |          |          |          |          |          |          |          |          |          |          |          |          |          |          |          |          |          |          |          |          |          |          |          |          |          |          |          |          |          |          |          |          |          |          |          |          |          |          |          |          |          |          |          |          |          |          |          |          |          |          |          |          |          |          |          |          |          |          |          |          |          |          |          |          |          |          |          |          |          |          |          |          |          |          |          |          |          |          |          |          |          |          |          |          |          |          |          |          |           |
|----|---------|----------|----------|----------|----------|----------|----------|----------|----------|----------|----------|----------|----------|----------|----------|----------|----------|----------|----------|----------|----------|----------|----------|----------|----------|----------|----------|----------|----------|----------|----------|----------|----------|----------|----------|----------|----------|----------|----------|----------|----------|----------|----------|----------|----------|----------|----------|----------|----------|----------|----------|----------|----------|----------|----------|----------|----------|----------|----------|----------|----------|----------|----------|----------|----------|----------|----------|----------|----------|----------|----------|----------|----------|----------|----------|----------|----------|----------|----------|----------|----------|----------|----------|----------|----------|----------|----------|----------|----------|----------|----------|----------|----------|----------|----------|----------|----------|----------|----------|----------|----------|----------|----------|----------|----------|----------|----------|----------|----------|----------|----------|----------|----------|----------|----------|----------|----------|----------|----------|----------|----------|----------|----------|----------|----------|----------|----------|----------|----------|----------|----------|----------|----------|----------|----------|----------|----------|----------|----------|----------|----------|----------|----------|----------|----------|----------|----------|----------|----------|----------|----------|----------|----------|----------|----------|----------|----------|----------|----------|----------|----------|----------|----------|----------|----------|----------|----------|----------|----------|----------|----------|----------|----------|----------|----------|----------|----------|----------|----------|----------|----------|----------|----------|----------|----------|----------|----------|----------|----------|----------|----------|----------|----------|----------|----------|----------|----------|----------|----------|----------|----------|----------|----------|----------|----------|----------|----------|----------|----------|----------|----------|----------|----------|----------|----------|----------|----------|----------|----------|----------|----------|----------|----------|----------|----------|----------|----------|----------|----------|----------|----------|----------|----------|----------|----------|----------|----------|----------|----------|----------|----------|----------|----------|----------|----------|----------|----------|----------|----------|----------|----------|----------|----------|----------|----------|----------|----------|----------|----------|----------|----------|----------|----------|----------|----------|----------|----------|----------|----------|----------|----------|----------|----------|----------|----------|----------|----------|----------|----------|----------|----------|----------|----------|----------|----------|----------|----------|----------|----------|----------|----------|----------|----------|----------|----------|----------|----------|----------|----------|----------|----------|----------|----------|----------|----------|----------|----------|----------|----------|----------|----------|----------|----------|----------|----------|----------|----------|----------|----------|----------|----------|----------|----------|----------|----------|----------|----------|----------|----------|----------|----------|----------|----------|----------|----------|----------|----------|----------|----------|----------|----------|----------|----------|----------|----------|----------|----------|----------|----------|----------|----------|----------|----------|----------|----------|----------|----------|----------|----------|----------|----------|----------|----------|----------|----------|----------|----------|----------|----------|----------|----------|----------|----------|----------|----------|----------|----------|----------|----------|----------|----------|----------|----------|----------|----------|----------|----------|----------|----------|----------|----------|----------|----------|----------|----------|----------|----------|----------|----------|----------|----------|----------|----------|----------|----------|----------|----------|----------|----------|----------|----------|----------|----------|----------|----------|----------|----------|----------|----------|----------|----------|----------|----------|----------|----------|----------|----------|----------|----------|----------|----------|----------|----------|----------|----------|----------|----------|----------|----------|----------|----------|----------|----------|----------|----------|----------|----------|----------|----------|----------|----------|----------|----------|----------|----------|----------|----------|----------|----------|----------|----------|----------|----------|----------|----------|----------|----------|----------|----------|----------|----------|----------|----------|----------|----------|----------|----------|----------|----------|----------|----------|----------|----------|----------|----------|----------|----------|----------|----------|----------|----------|----------|----------|----------|----------|----------|----------|----------|----------|----------|----------|----------|----------|----------|----------|----------|----------|----------|----------|----------|----------|----------|----------|----------|----------|----------|----------|----------|----------|----------|----------|----------|----------|----------|----------|----------|----------|----------|----------|----------|----------|----------|----------|----------|----------|----------|----------|----------|----------|----------|----------|----------|----------|----------|----------|----------|----------|----------|----------|----------|----------|----------|----------|----------|----------|----------|----------|----------|----------|----------|----------|----------|----------|----------|----------|----------|----------|----------|----------|----------|----------|----------|----------|----------|----------|----------|----------|----------|----------|----------|----------|----------|----------|----------|----------|----------|----------|----------|----------|----------|----------|----------|----------|----------|----------|----------|----------|----------|----------|----------|----------|----------|----------|----------|----------|----------|----------|----------|----------|----------|----------|----------|----------|----------|----------|----------|----------|----------|----------|----------|----------|----------|----------|----------|----------|----------|----------|----------|----------|----------|----------|----------|----------|----------|----------|----------|----------|----------|----------|----------|----------|----------|----------|----------|----------|----------|----------|----------|----------|----------|----------|----------|----------|----------|----------|----------|----------|----------|----------|----------|----------|----------|----------|----------|-----------|
| 00 | 8025000 | 80131000 | 80160000 | 80190000 | 80220000 | 80250000 | 80280000 | 80310000 | 80340000 | 80370000 | 80400000 | 80430000 | 80460000 | 80490000 | 80520000 | 80550000 | 80580000 | 80610000 | 80640000 | 80670000 | 80700000 | 80730000 | 80760000 | 80790000 | 80820000 | 80850000 | 80880000 | 80910000 | 80940000 | 80970000 | 81000000 | 81030000 | 81060000 | 81090000 | 81120000 | 81150000 | 81180000 | 81210000 | 81240000 | 81270000 | 81300000 | 81330000 | 81360000 | 81390000 | 81420000 | 81450000 | 81480000 | 81510000 | 81540000 | 81570000 | 81600000 | 81630000 | 81660000 | 81690000 | 81720000 | 81750000 | 81780000 | 81810000 | 81840000 | 81870000 | 81900000 | 81930000 | 81960000 | 81990000 | 82020000 | 82050000 | 82080000 | 82110000 | 82140000 | 82170000 | 82200000 | 82230000 | 82260000 | 82290000 | 82320000 | 82350000 | 82380000 | 82410000 | 82440000 | 82470000 | 82500000 | 82530000 | 82560000 | 82590000 | 82620000 | 82650000 | 82680000 | 82710000 | 82740000 | 82770000 | 82800000 | 82830000 | 82860000 | 82890000 | 82920000 | 82950000 | 82980000 | 83010000 | 83040000 | 83070000 | 83100000 | 83130000 | 83160000 | 83190000 | 83220000 | 83250000 | 83280000 | 83310000 | 83340000 | 83370000 | 83400000 | 83430000 | 83460000 | 83490000 | 83520000 | 83550000 | 83580000 | 83610000 | 83640000 | 83670000 | 83700000 | 83730000 | 83760000 | 83790000 | 83820000 | 83850000 | 83880000 | 83910000 | 83940000 | 83970000 | 84000000 | 84030000 | 84060000 | 84090000 | 84120000 | 84150000 | 84180000 | 84210000 | 84240000 | 84270000 | 84300000 | 84330000 | 84360000 | 84390000 | 84420000 | 84450000 | 84480000 | 84510000 | 84540000 | 84570000 | 84600000 | 84630000 | 84660000 | 84690000 | 84720000 | 84750000 | 84780000 | 84810000 | 84840000 | 84870000 | 84900000 | 84930000 | 84960000 | 84990000 | 85020000 | 85050000 | 85080000 | 85110000 | 85140000 | 85170000 | 85200000 | 85230000 | 85260000 | 85290000 | 85320000 | 85350000 | 85380000 | 85410000 | 85440000 | 85470000 | 85500000 | 85530000 | 85560000 | 85590000 | 85620000 | 85650000 | 85680000 | 85710000 | 85740000 | 85770000 | 85800000 | 85830000 | 85860000 | 85890000 | 85920000 | 85950000 | 85980000 | 86010000 | 86040000 | 86070000 | 86100000 | 86130000 | 86160000 | 86190000 | 86220000 | 86250000 | 86280000 | 86310000 | 86340000 | 86370000 | 86400000 | 86430000 | 86460000 | 86490000 | 86520000 | 86550000 | 86580000 | 86610000 | 86640000 | 86670000 | 86700000 | 86730000 | 86760000 | 86790000 | 86820000 | 86850000 | 86880000 | 86910000 | 86940000 | 86970000 | 87000000 | 87030000 | 87060000 | 87090000 | 87120000 | 87150000 | 87180000 | 87210000 | 87240000 | 87270000 | 87300000 | 87330000 | 87360000 | 87390000 | 87420000 | 87450000 | 87480000 | 87510000 | 87540000 | 87570000 | 87600000 | 87630000 | 87660000 | 87690000 | 87720000 | 87750000 | 87780000 | 87810000 | 87840000 | 87870000 | 87900000 | 87930000 | 87960000 | 87990000 | 88020000 | 88050000 | 88080000 | 88110000 | 88140000 | 88170000 | 88200000 | 88230000 | 88260000 | 88290000 | 88320000 | 88350000 | 88380000 | 88410000 | 88440000 | 88470000 | 88500000 | 88530000 | 88560000 | 88590000 | 88620000 | 88650000 | 88680000 | 88710000 | 88740000 | 88770000 | 88800000 | 88830000 | 88860000 | 88890000 | 88920000 | 88950000 | 88980000 | 89010000 | 89040000 | 89070000 | 89100000 | 89130000 | 89160000 | 89190000 | 89220000 | 89250000 | 89280000 | 89310000 | 89340000 | 89370000 | 89400000 | 89430000 | 89460000 | 89490000 | 89520000 | 89550000 | 89580000 | 89610000 | 89640000 | 89670000 | 89700000 | 89730000 | 89760000 | 89790000 | 89820000 | 89850000 | 89880000 | 89910000 | 89940000 | 89970000 | 90000000 | 90030000 | 90060000 | 90090000 | 90120000 | 90150000 | 90180000 | 90210000 | 90240000 | 90270000 | 90300000 | 90330000 | 90360000 | 90390000 | 90420000 | 90450000 | 90480000 | 90510000 | 90540000 | 90570000 | 90600000 | 90630000 | 90660000 | 90690000 | 90720000 | 90750000 | 90780000 | 90810000 | 90840000 | 90870000 | 90900000 | 90930000 | 90960000 | 90990000 | 91020000 | 91050000 | 91080000 | 91110000 | 91140000 | 91170000 | 91200000 | 91230000 | 91260000 | 91290000 | 91320000 | 91350000 | 91380000 | 91410000 | 91440000 | 91470000 | 91500000 | 91530000 | 91560000 | 91590000 | 91620000 | 91650000 | 91680000 | 91710000 | 91740000 | 91770000 | 91800000 | 91830000 | 91860000 | 91890000 | 91920000 | 91950000 | 91980000 | 92010000 | 92040000 | 92070000 | 92100000 | 92130000 | 92160000 | 92190000 | 92220000 | 92250000 | 92280000 | 92310000 | 92340000 | 92370000 | 92400000 | 92430000 | 92460000 | 92490000 | 92520000 | 92550000 | 92580000 | 92610000 | 92640000 | 92670000 | 92700000 | 92730000 | 92760000 | 92790000 | 92820000 | 92850000 | 92880000 | 92910000 | 92940000 | 92970000 | 93000000 | 93030000 | 93060000 | 93090000 | 93120000 | 93150000 | 93180000 | 93210000 | 93240000 | 93270000 | 93300000 | 93330000 | 93360000 | 93390000 | 93420000 | 93450000 | 93480000 | 93510000 | 93540000 | 93570000 | 93600000 | 93630000 | 93660000 | 93690000 | 93720000 | 93750000 | 93780000 | 93810000 | 93840000 | 93870000 | 93900000 | 93930000 | 93960000 | 93990000 | 94020000 | 94050000 | 94080000 | 94110000 | 94140000 | 94170000 | 94200000 | 94230000 | 94260000 | 94290000 | 94320000 | 94350000 | 94380000 | 94410000 | 94440000 | 94470000 | 94500000 | 94530000 | 94560000 | 94590000 | 94620000 | 94650000 | 94680000 | 94710000 | 94740000 | 94770000 | 94800000 | 94830000 | 94860000 | 94890000 | 94920000 | 94950000 | 94980000 | 95010000 | 95040000 | 95070000 | 95100000 | 95130000 | 95160000 | 95190000 | 95220000 | 95250000 | 95280000 | 95310000 | 95340000 | 95370000 | 95400000 | 95430000 | 95460000 | 95490000 | 95520000 | 95550000 | 95580000 | 95610000 | 95640000 | 95670000 | 95700000 | 95730000 | 95760000 | 95790000 | 95820000 | 95850000 | 95880000 | 95910000 | 95940000 | 95970000 | 96000000 | 96030000 | 96060000 | 96090000 | 96120000 | 96150000 | 96180000 | 96210000 | 96240000 | 96270000 | 96300000 | 96330000 | 96360000 | 96390000 | 96420000 | 96450000 | 96480000 | 96510000 | 96540000 | 96570000 | 96600000 | 96630000 | 96660000 | 96690000 | 96720000 | 96750000 | 96780000 | 96810000 | 96840000 | 96870000 | 96900000 | 96930000 | 96960000 | 96990000 | 97020000 | 97050000 | 97080000 | 97110000 | 97140000 | 97170000 | 97200000 | 97230000 | 97260000 | 97290000 | 97320000 | 97350000 | 97380000 | 97410000 | 97440000 | 97470000 | 97500000 | 97530000 | 97560000 | 97590000 | 97620000 | 97650000 | 97680000 | 97710000 | 97740000 | 97770000 | 97800000 | 97830000 | 97860000 | 97890000 | 97920000 | 97950000 | 97980000 | 98010000 | 98040000 | 98070000 | 98100000 | 98130000 | 98160000 | 98190000 | 98220000 | 98250000 | 98280000 | 98310000 | 98340000 | 98370000 | 98400000 | 98430000 | 98460000 | 98490000 | 98520000 | 98550000 | 98580000 | 98610000 | 98640000 | 98670000 | 98700000 | 98730000 | 98760000 | 98790000 | 98820000 | 98850000 | 98880000 | 98910000 | 98940000 | 98970000 | 99000000 | 99030000 | 99060000 | 99090000 | 99120000 | 99150000 | 99180000 | 99210000 | 99240000 | 99270000 | 99300000 | 99330000 | 99360000 | 99390000 | 99420000 | 99450000 | 99480000 | 99510000 | 99540000 | 99570000 | 99600000 | 99630000 | 99660000 | 99690000 | 99720000 | 99750000 | 99780000 | 99810000 | 99840000 | 99870000 | 99900000 | 99930000 | 99960000 | 99990000 | 100000000 |
|----|---------|----------|----------|----------|----------|----------|----------|----------|----------|----------|----------|----------|----------|----------|----------|----------|----------|----------|----------|----------|----------|----------|----------|----------|----------|----------|----------|----------|----------|----------|----------|----------|----------|----------|----------|----------|----------|----------|----------|----------|----------|----------|----------|----------|----------|----------|----------|----------|----------|----------|----------|----------|----------|----------|----------|----------|----------|----------|----------|----------|----------|----------|----------|----------|----------|----------|----------|----------|----------|----------|----------|----------|----------|----------|----------|----------|----------|----------|----------|----------|----------|----------|----------|----------|----------|----------|----------|----------|----------|----------|----------|----------|----------|----------|----------|----------|----------|----------|----------|----------|----------|----------|----------|----------|----------|----------|----------|----------|----------|----------|----------|----------|----------|----------|----------|----------|----------|----------|----------|----------|----------|----------|----------|----------|----------|----------|----------|----------|----------|----------|----------|----------|----------|----------|----------|----------|----------|----------|----------|----------|----------|----------|----------|----------|----------|----------|----------|----------|----------|----------|----------|----------|----------|----------|----------|----------|----------|----------|----------|----------|----------|----------|----------|----------|----------|----------|----------|----------|----------|----------|----------|----------|----------|----------|----------|----------|----------|----------|----------|----------|----------|----------|----------|----------|----------|----------|----------|----------|----------|----------|----------|----------|----------|----------|----------|----------|----------|----------|----------|----------|----------|----------|----------|----------|----------|----------|----------|----------|----------|----------|----------|----------|----------|----------|----------|----------|----------|----------|----------|----------|----------|----------|----------|----------|----------|----------|----------|----------|----------|----------|----------|----------|----------|----------|----------|----------|----------|----------|----------|----------|----------|----------|----------|----------|----------|----------|----------|----------|----------|----------|----------|----------|----------|----------|----------|----------|----------|----------|----------|----------|----------|----------|----------|----------|----------|----------|----------|----------|----------|----------|----------|----------|----------|----------|----------|----------|----------|----------|----------|----------|----------|----------|----------|----------|----------|----------|----------|----------|----------|----------|----------|----------|----------|----------|----------|----------|----------|----------|----------|----------|----------|----------|----------|----------|----------|----------|----------|----------|----------|----------|----------|----------|----------|----------|----------|----------|----------|----------|----------|----------|----------|----------|----------|----------|----------|----------|----------|----------|----------|----------|----------|----------|----------|----------|----------|----------|----------|----------|----------|----------|----------|----------|----------|----------|----------|----------|----------|----------|----------|----------|----------|----------|----------|----------|----------|----------|----------|----------|----------|----------|----------|----------|----------|----------|----------|----------|----------|----------|----------|----------|----------|----------|----------|----------|----------|----------|----------|----------|----------|----------|----------|----------|----------|----------|----------|----------|----------|----------|----------|----------|----------|----------|----------|----------|----------|----------|----------|----------|----------|----------|----------|----------|----------|----------|----------|----------|----------|----------|----------|----------|----------|----------|----------|----------|----------|----------|----------|----------|----------|----------|----------|----------|----------|----------|----------|----------|----------|----------|----------|----------|----------|----------|----------|----------|----------|----------|----------|----------|----------|----------|----------|----------|----------|----------|----------|----------|----------|----------|----------|----------|----------|----------|----------|----------|----------|----------|----------|----------|----------|----------|----------|----------|----------|----------|----------|----------|----------|----------|----------|----------|----------|----------|----------|----------|----------|----------|----------|----------|----------|----------|----------|----------|----------|----------|----------|----------|----------|----------|----------|----------|----------|----------|----------|----------|----------|----------|----------|----------|----------|----------|----------|----------|----------|----------|----------|----------|----------|----------|----------|----------|----------|----------|----------|----------|----------|----------|----------|----------|----------|----------|----------|----------|----------|----------|----------|----------|----------|----------|----------|----------|----------|----------|----------|----------|----------|----------|----------|----------|----------|----------|----------|----------|----------|----------|----------|----------|----------|----------|----------|----------|----------|----------|----------|----------|----------|----------|----------|----------|----------|----------|----------|----------|----------|----------|----------|----------|----------|----------|----------|----------|----------|----------|----------|----------|----------|----------|----------|----------|----------|----------|----------|----------|----------|----------|----------|----------|----------|----------|----------|----------|----------|----------|----------|----------|----------|----------|----------|----------|----------|----------|----------|----------|----------|----------|----------|----------|----------|----------|----------|----------|----------|----------|----------|----------|----------|----------|----------|----------|----------|----------|----------|----------|----------|----------|----------|----------|----------|----------|----------|----------|----------|----------|----------|----------|----------|----------|----------|----------|----------|----------|----------|----------|----------|----------|----------|----------|----------|----------|----------|----------|----------|----------|----------|----------|----------|----------|----------|----------|----------|----------|----------|----------|----------|----------|-----------|



















Table with 10 columns: ID, X, Y, Z, W, V, U, T, S, R, Q, P, O, N, M, L, K, J, I, H, G, F, E, D, C, B, A. Contains a grid of numerical data points.





































































































































|        |        |        |        |        |        |        |        |        |        |        |        |        |        |        |        |        |        |        |        |        |        |        |        |        |        |        |        |        |        |        |        |        |        |        |        |        |        |        |        |        |        |        |        |        |        |        |        |        |        |        |        |        |        |        |        |        |        |        |        |        |        |        |        |        |        |        |        |        |        |        |        |        |        |        |        |        |        |        |        |        |        |        |        |        |        |        |        |        |        |        |        |        |        |        |        |        |        |        |        |        |        |        |        |        |        |        |        |        |        |        |        |        |        |        |        |        |        |        |        |        |        |        |        |        |        |        |        |        |        |        |        |        |        |        |        |        |        |        |        |        |        |        |        |        |        |        |        |        |        |        |        |        |        |        |        |        |        |        |        |        |        |        |        |        |        |        |        |        |        |        |        |        |        |        |        |        |        |        |        |        |        |        |        |        |        |        |        |        |        |        |        |        |        |        |        |        |        |        |        |
|--------|--------|--------|--------|--------|--------|--------|--------|--------|--------|--------|--------|--------|--------|--------|--------|--------|--------|--------|--------|--------|--------|--------|--------|--------|--------|--------|--------|--------|--------|--------|--------|--------|--------|--------|--------|--------|--------|--------|--------|--------|--------|--------|--------|--------|--------|--------|--------|--------|--------|--------|--------|--------|--------|--------|--------|--------|--------|--------|--------|--------|--------|--------|--------|--------|--------|--------|--------|--------|--------|--------|--------|--------|--------|--------|--------|--------|--------|--------|--------|--------|--------|--------|--------|--------|--------|--------|--------|--------|--------|--------|--------|--------|--------|--------|--------|--------|--------|--------|--------|--------|--------|--------|--------|--------|--------|--------|--------|--------|--------|--------|--------|--------|--------|--------|--------|--------|--------|--------|--------|--------|--------|--------|--------|--------|--------|--------|--------|--------|--------|--------|--------|--------|--------|--------|--------|--------|--------|--------|--------|--------|--------|--------|--------|--------|--------|--------|--------|--------|--------|--------|--------|--------|--------|--------|--------|--------|--------|--------|--------|--------|--------|--------|--------|--------|--------|--------|--------|--------|--------|--------|--------|--------|--------|--------|--------|--------|--------|--------|--------|--------|--------|--------|--------|--------|--------|--------|--------|--------|--------|--------|--------|--------|--------|--------|--------|--------|--------|--------|--------|
| 001801 | 001802 | 001803 | 001804 | 001805 | 001806 | 001807 | 001808 | 001809 | 001810 | 001811 | 001812 | 001813 | 001814 | 001815 | 001816 | 001817 | 001818 | 001819 | 001820 | 001821 | 001822 | 001823 | 001824 | 001825 | 001826 | 001827 | 001828 | 001829 | 001830 | 001831 | 001832 | 001833 | 001834 | 001835 | 001836 | 001837 | 001838 | 001839 | 001840 | 001841 | 001842 | 001843 | 001844 | 001845 | 001846 | 001847 | 001848 | 001849 | 001850 | 001851 | 001852 | 001853 | 001854 | 001855 | 001856 | 001857 | 001858 | 001859 | 001860 | 001861 | 001862 | 001863 | 001864 | 001865 | 001866 | 001867 | 001868 | 001869 | 001870 | 001871 | 001872 | 001873 | 001874 | 001875 | 001876 | 001877 | 001878 | 001879 | 001880 | 001881 | 001882 | 001883 | 001884 | 001885 | 001886 | 001887 | 001888 | 001889 | 001890 | 001891 | 001892 | 001893 | 001894 | 001895 | 001896 | 001897 | 001898 | 001899 | 001900 | 001901 | 001902 | 001903 | 001904 | 001905 | 001906 | 001907 | 001908 | 001909 | 001910 | 001911 | 001912 | 001913 | 001914 | 001915 | 001916 | 001917 | 001918 | 001919 | 001920 | 001921 | 001922 | 001923 | 001924 | 001925 | 001926 | 001927 | 001928 | 001929 | 001930 | 001931 | 001932 | 001933 | 001934 | 001935 | 001936 | 001937 | 001938 | 001939 | 001940 | 001941 | 001942 | 001943 | 001944 | 001945 | 001946 | 001947 | 001948 | 001949 | 001950 | 001951 | 001952 | 001953 | 001954 | 001955 | 001956 | 001957 | 001958 | 001959 | 001960 | 001961 | 001962 | 001963 | 001964 | 001965 | 001966 | 001967 | 001968 | 001969 | 001970 | 001971 | 001972 | 001973 | 001974 | 001975 | 001976 | 001977 | 001978 | 001979 | 001980 | 001981 | 001982 | 001983 | 001984 | 001985 | 001986 | 001987 | 001988 | 001989 | 001990 | 001991 | 001992 | 001993 | 001994 | 001995 | 001996 | 001997 | 001998 | 001999 | 002000 |
|--------|--------|--------|--------|--------|--------|--------|--------|--------|--------|--------|--------|--------|--------|--------|--------|--------|--------|--------|--------|--------|--------|--------|--------|--------|--------|--------|--------|--------|--------|--------|--------|--------|--------|--------|--------|--------|--------|--------|--------|--------|--------|--------|--------|--------|--------|--------|--------|--------|--------|--------|--------|--------|--------|--------|--------|--------|--------|--------|--------|--------|--------|--------|--------|--------|--------|--------|--------|--------|--------|--------|--------|--------|--------|--------|--------|--------|--------|--------|--------|--------|--------|--------|--------|--------|--------|--------|--------|--------|--------|--------|--------|--------|--------|--------|--------|--------|--------|--------|--------|--------|--------|--------|--------|--------|--------|--------|--------|--------|--------|--------|--------|--------|--------|--------|--------|--------|--------|--------|--------|--------|--------|--------|--------|--------|--------|--------|--------|--------|--------|--------|--------|--------|--------|--------|--------|--------|--------|--------|--------|--------|--------|--------|--------|--------|--------|--------|--------|--------|--------|--------|--------|--------|--------|--------|--------|--------|--------|--------|--------|--------|--------|--------|--------|--------|--------|--------|--------|--------|--------|--------|--------|--------|--------|--------|--------|--------|--------|--------|--------|--------|--------|--------|--------|--------|--------|--------|--------|--------|--------|--------|--------|--------|--------|--------|--------|--------|--------|--------|--------|













| FOUR      | FIVE      | SIX       | SEVEN     | EIGHT     | NINE      | TEN       | ELEVEN    | TWELVE    | THIRTEEN  | FOURTEEN  | FIFTEEN   | SIXTEEN   | SEVENTEEN | EIGHTEEN  | NINETEEN  | TWENTY    | TWENTYONE | TWENTYTWO | TWENTYTHREE | TWENTYFOUR | TWENTYFIVE | TWENTYSIX | TWENTYSEVEN | TWENTYEIGHT | TWENTYNINE | THIRTY    | THIRTYONE | THIRTYTWO | THIRTYTHREE | THIRTYFOUR | THIRTYFIVE | THIRTYSIX | THIRTYSEVEN | THIRTYEIGHT | THIRTYNINE | FOURTY    | FOURTYONE | FOURTYTWO | FOURTYTHREE | FOURTYFOUR | FOURTYFIVE | FOURTYSIX | FOURTYSEVEN | FOURTYEIGHT | FOURTYNINE | FIFTY     | FIFTYONE  | FIFTYTWO  | FIFTYTHREE | FIFTYFOUR | FIFTYFIVE | FIFTYSIX  | FIFTYSEVEN | FIFTYEIGHT | FIFTYNINE | SIXTY     | SIXTYONE  | SIXTYTWO  | SIXTYTHREE | SIXTYFOUR | SIXTYFIVE | SIXTYSIX  | SIXTYSEVEN | SIXTYEIGHT | SIXTYNINE | SEVENTY   | SEVENTYONE | SEVENTYTWO | SEVENTYTHREE | SEVENTYFOUR | SEVENTYFIVE | SEVENTYSIX | SEVENTYSEVEN | SEVENTYEIGHT | SEVENTYNINE | EIGHTY    | EIGHTYONE | EIGHTYTWO | EIGHTYTHREE | EIGHTYFOUR | EIGHTYFIVE | EIGHTYSIX | EIGHTYSEVEN | EIGHTYEIGHT | EIGHTYNINE | NINETY | NINETYONE | NINETYTWO | NINETYTHREE | NINETYFOUR | NINETYFIVE | NINETYSEX | NINETYSEVEN | NINETYEIGHT | NINETYNINE | HUNDRED |
|-----------|-----------|-----------|-----------|-----------|-----------|-----------|-----------|-----------|-----------|-----------|-----------|-----------|-----------|-----------|-----------|-----------|-----------|-----------|-------------|------------|------------|-----------|-------------|-------------|------------|-----------|-----------|-----------|-------------|------------|------------|-----------|-------------|-------------|------------|-----------|-----------|-----------|-------------|------------|------------|-----------|-------------|-------------|------------|-----------|-----------|-----------|------------|-----------|-----------|-----------|------------|------------|-----------|-----------|-----------|-----------|------------|-----------|-----------|-----------|------------|------------|-----------|-----------|------------|------------|--------------|-------------|-------------|------------|--------------|--------------|-------------|-----------|-----------|-----------|-------------|------------|------------|-----------|-------------|-------------|------------|--------|-----------|-----------|-------------|------------|------------|-----------|-------------|-------------|------------|---------|
| 04.002024 | 04.002025 | 04.002026 | 04.002027 | 04.002028 | 04.002029 | 04.002030 | 04.002031 | 04.002032 | 04.002033 | 04.002034 | 04.002035 | 04.002036 | 04.002037 | 04.002038 | 04.002039 | 04.002040 | 04.002041 | 04.002042 | 04.002043   | 04.002044  | 04.002045  | 04.002046 | 04.002047   | 04.002048   | 04.002049  | 04.002050 | 04.002051 | 04.002052 | 04.002053   | 04.002054  | 04.002055  | 04.002056 | 04.002057   | 04.002058   | 04.002059  | 04.002060 | 04.002061 | 04.002062 | 04.002063   | 04.002064  | 04.002065  | 04.002066 | 04.002067   | 04.002068   | 04.002069  | 04.002070 | 04.002071 | 04.002072 | 04.002073  | 04.002074 | 04.002075 | 04.002076 | 04.002077  | 04.002078  | 04.002079 | 04.002080 | 04.002081 | 04.002082 | 04.002083  | 04.002084 | 04.002085 | 04.002086 | 04.002087  | 04.002088  | 04.002089 | 04.002090 | 04.002091  | 04.002092  | 04.002093    | 04.002094   | 04.002095   | 04.002096  | 04.002097    | 04.002098    | 04.002099   | 04.002100 |           |           |             |            |            |           |             |             |            |        |           |           |             |            |            |           |             |             |            |         |

Table with 5 columns: ID, Name, Address, City, State. Contains a large list of entries with varying lengths of text in each cell.



























|           |           |           |           |           |           |           |           |           |           |           |           |           |           |           |           |           |           |           |           |           |           |           |           |           |           |           |           |           |           |           |           |           |           |           |           |           |           |           |           |           |           |           |           |           |           |           |           |           |           |           |           |           |           |           |           |           |           |           |           |           |           |           |           |           |           |           |           |           |           |           |           |           |           |           |           |           |           |           |           |           |           |           |           |           |           |           |           |           |           |           |           |           |           |           |           |           |           |           |           |
|-----------|-----------|-----------|-----------|-----------|-----------|-----------|-----------|-----------|-----------|-----------|-----------|-----------|-----------|-----------|-----------|-----------|-----------|-----------|-----------|-----------|-----------|-----------|-----------|-----------|-----------|-----------|-----------|-----------|-----------|-----------|-----------|-----------|-----------|-----------|-----------|-----------|-----------|-----------|-----------|-----------|-----------|-----------|-----------|-----------|-----------|-----------|-----------|-----------|-----------|-----------|-----------|-----------|-----------|-----------|-----------|-----------|-----------|-----------|-----------|-----------|-----------|-----------|-----------|-----------|-----------|-----------|-----------|-----------|-----------|-----------|-----------|-----------|-----------|-----------|-----------|-----------|-----------|-----------|-----------|-----------|-----------|-----------|-----------|-----------|-----------|-----------|-----------|-----------|-----------|-----------|-----------|-----------|-----------|-----------|-----------|-----------|-----------|-----------|-----------|
| FOI000001 | FOI000002 | FOI000003 | FOI000004 | FOI000005 | FOI000006 | FOI000007 | FOI000008 | FOI000009 | FOI000010 | FOI000011 | FOI000012 | FOI000013 | FOI000014 | FOI000015 | FOI000016 | FOI000017 | FOI000018 | FOI000019 | FOI000020 | FOI000021 | FOI000022 | FOI000023 | FOI000024 | FOI000025 | FOI000026 | FOI000027 | FOI000028 | FOI000029 | FOI000030 | FOI000031 | FOI000032 | FOI000033 | FOI000034 | FOI000035 | FOI000036 | FOI000037 | FOI000038 | FOI000039 | FOI000040 | FOI000041 | FOI000042 | FOI000043 | FOI000044 | FOI000045 | FOI000046 | FOI000047 | FOI000048 | FOI000049 | FOI000050 | FOI000051 | FOI000052 | FOI000053 | FOI000054 | FOI000055 | FOI000056 | FOI000057 | FOI000058 | FOI000059 | FOI000060 | FOI000061 | FOI000062 | FOI000063 | FOI000064 | FOI000065 | FOI000066 | FOI000067 | FOI000068 | FOI000069 | FOI000070 | FOI000071 | FOI000072 | FOI000073 | FOI000074 | FOI000075 | FOI000076 | FOI000077 | FOI000078 | FOI000079 | FOI000080 | FOI000081 | FOI000082 | FOI000083 | FOI000084 | FOI000085 | FOI000086 | FOI000087 | FOI000088 | FOI000089 | FOI000090 | FOI000091 | FOI000092 | FOI000093 | FOI000094 | FOI000095 | FOI000096 | FOI000097 | FOI000098 | FOI000099 | FOI000100 |
|-----------|-----------|-----------|-----------|-----------|-----------|-----------|-----------|-----------|-----------|-----------|-----------|-----------|-----------|-----------|-----------|-----------|-----------|-----------|-----------|-----------|-----------|-----------|-----------|-----------|-----------|-----------|-----------|-----------|-----------|-----------|-----------|-----------|-----------|-----------|-----------|-----------|-----------|-----------|-----------|-----------|-----------|-----------|-----------|-----------|-----------|-----------|-----------|-----------|-----------|-----------|-----------|-----------|-----------|-----------|-----------|-----------|-----------|-----------|-----------|-----------|-----------|-----------|-----------|-----------|-----------|-----------|-----------|-----------|-----------|-----------|-----------|-----------|-----------|-----------|-----------|-----------|-----------|-----------|-----------|-----------|-----------|-----------|-----------|-----------|-----------|-----------|-----------|-----------|-----------|-----------|-----------|-----------|-----------|-----------|-----------|-----------|-----------|-----------|-----------|

Table with columns: ID, Name, Birth Date, Birth Time, Birth Place, and various numerical data points. The table contains 200 rows of data, each with a unique identifier and associated personal information.















Table with multiple columns containing numerical data and alphanumeric codes. Each row represents a specific entry with various identifiers and values.
